# Supplementary material for: Altered function and differentiation of age-associated B cells contribute to the female bias in lupus mice
Source: PubMed Central journal article supplement (PMC8355159; doi:10.1038/s41467-021-25102-8), 2021-08-10
Supplement: 41467_2021_25102_MOESM3_ESM.pdf [file 41467_2021_25102_MOESM3_ESM.pdf]

## **Description of Additional Supplementary Files**

File Name: Supplementary Data 1

Description: Differentially Expressed Peaks between ABCs in DKO(F) vs DKO(M).

File Name: Supplementary Data 2

Description: Differentially Expressed Peaks between ABCs in Yaa-DKO vs. DKO(M).

File Name: Supplementary Data 3

Description: CUT&RUN Dataset from DKO(M) and DKO(F) FoBs and ABCs.

File Name: Supplementary Data 4

Description: Metadata Table for BCR-seq.
